# Supplementary material for: Synthesis and properties of the kojic acid dimer and its potential for the treatment of Alzheimer's disease
Source: Royal Society of Chemistry journal article supplement (doi:10.1039/d2md00383j), 2022-12-09
Supplement: d2md00383j4.pdf [file d2md00383j4.pdf]

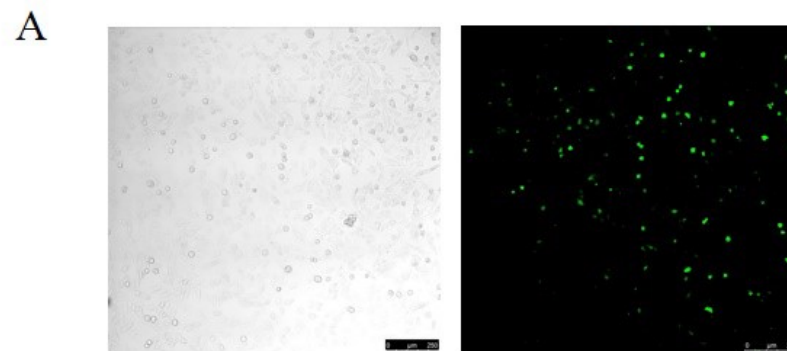

**Control**

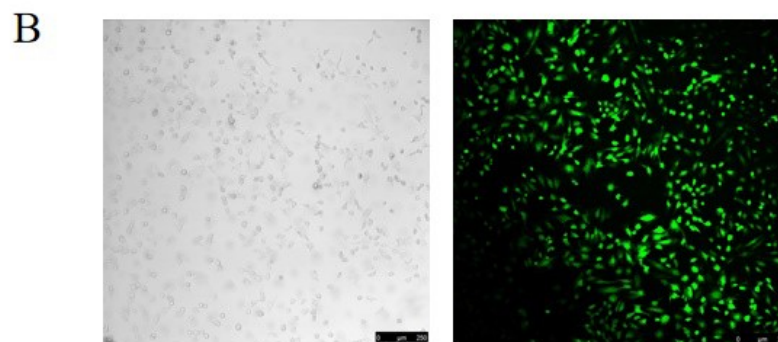

**H<sub>2</sub>O<sub>2</sub>**

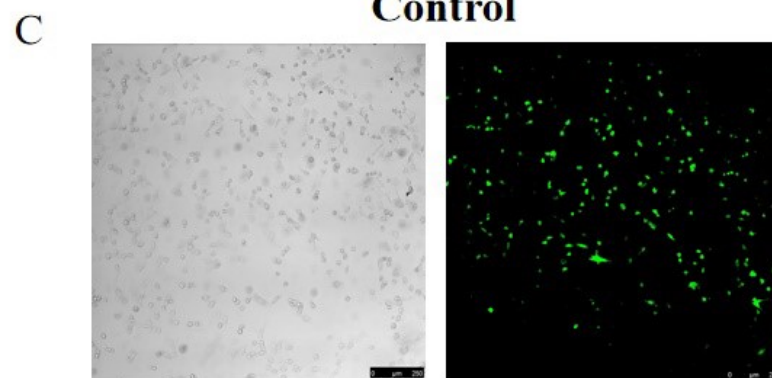

**500 μM KAD**

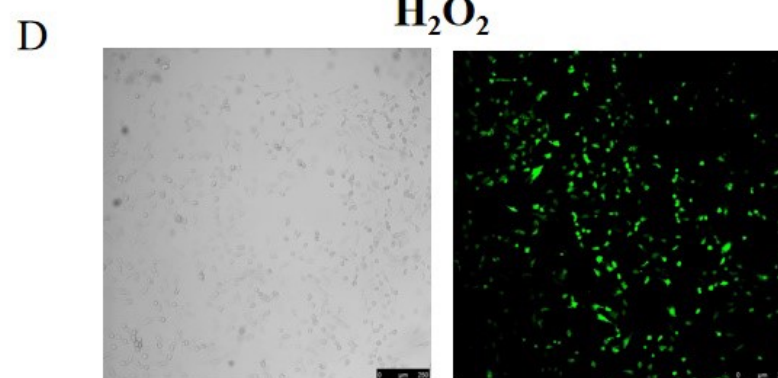

**500 μM KAD + H<sub>2</sub>O<sub>2</sub>**

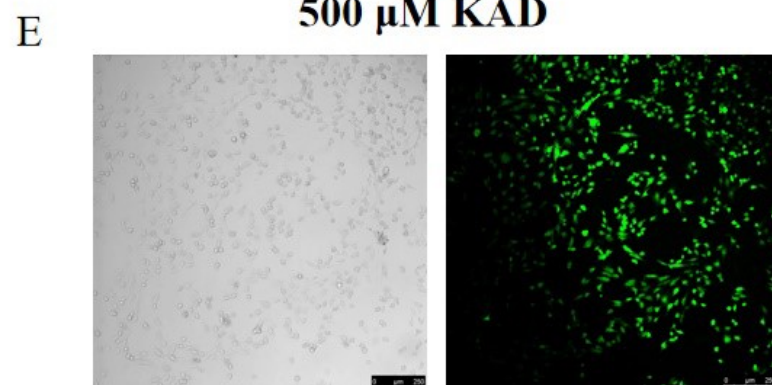

**250 μM KAD + H<sub>2</sub>O<sub>2</sub>**

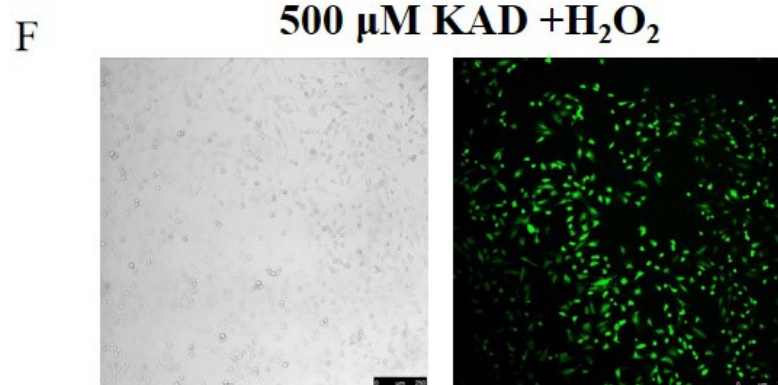

**125 μM KAD + H<sub>2</sub>O<sub>2</sub>**
