# Supplementary material for: Synthesis and properties of the kojic acid dimer and its potential for the treatment of Alzheimer's disease
Source: Royal Society of Chemistry journal article supplement (doi:10.1039/d2md00383j), 2022-12-09
Supplement: d2md00383j6.pdf [file d2md00383j6.pdf]

## **Synthesis and properties of Kojic acid dimer and its potential for the treatment of Alzheimer's disease**

Xueyan Liu,<sup>‡a,b</sup> Chuanyu Yu<sup>‡a</sup>, Biling Su<sup>‡a</sup> and Daijun Zha<sup>\*a,b</sup>

<sup>a</sup>Department of Medicinal Chemistry, School of Pharmacy, Fujian Medical University, Fuzhou 350004, Fujian Province, China. E-mail: zhadj@fjmu.edu.cn

<sup>b</sup>Fujian Key Laboratory of Drug Target Discovery and Structural and Functional Research, Fujian Medical University, China

<sup>‡</sup> These authors contributed equal to this work

| No. | Content                                                                                                                                          | Page |
|-----|--------------------------------------------------------------------------------------------------------------------------------------------------|------|
| 1   | Figure S1. <sup>1</sup> H NMR spectrum of 2a                                                                                                     | 3    |
| 2   | Figure S2. <sup>13</sup> C NMR spectrum of 2a                                                                                                    | 3    |
| 3   | Figure S3. HPLC of compound 2a                                                                                                                   | 4    |
| 4   | Figure S4. <sup>1</sup> H NMR spectrum of 2a                                                                                                     | 5    |
| 5   | Figure S5. <sup>1</sup> H NMR spectrum of 2b                                                                                                     | 5    |
| 6   | Figure S6. <sup>13</sup> C NMR spectrum of 2b                                                                                                    | 6    |
| 7   | Figure S7. HPLC of compound 2b                                                                                                                   | 6    |
| 8   | Figure S8. <sup>1</sup> H NMR spectrum of 2b                                                                                                     | 7    |
| 9   | Figure S9. <sup>1</sup> H NMR spectrum of 2c                                                                                                     | 7    |
| 10  | Figure S10. <sup>13</sup> C NMR spectrum of 2c                                                                                                   | 8    |
| 11  | Figure S11. HPLC of compound 2c                                                                                                                  | 8    |
| 12  | Figure S12. <sup>1</sup> H NMR spectrum of 2c                                                                                                    | 9    |
| 13  | Figure S13. <sup>1</sup> H NMR spectrum of KAD                                                                                                   | 9    |
| 14  | Figure S14. <sup>13</sup> C NMR spectrum of KAD                                                                                                  | 10   |
| 15  | Figure S15. HPLC of compound KAD                                                                                                                 | 10   |
| 16  | Figure S16. HRMS of compound KAD                                                                                                                 | 10   |
| 17  | Figure S17. Docking study of KA with A $\beta$ <sub>1-42</sub>                                                                                   | 11   |
| 18  | Figure S18. 2D schematic diagram and predicted docking scoring of KAD and KA with A $\beta$ <sub>1-42</sub> .                                    | 11   |
| 19  | Figure S19. KAD inhibits H <sub>2</sub> O <sub>2</sub> -induced injury in H9c2 cells                                                             | 12   |
| 20  | Figure S20. Inhibitory effect of KAD on intracellular ROS accumulation in H9c2 cells exposed to H <sub>2</sub> O <sub>2</sub>                    | 12   |
| 21  | Figure S21. KAD alleviated intracellular ROS accumulation and increased the SOD activity induced by H <sub>2</sub> O <sub>2</sub> in H9c2 cells. | 13   |
| 22  | Table S1. Summary of crystallographic data                                                                                                       | 14   |

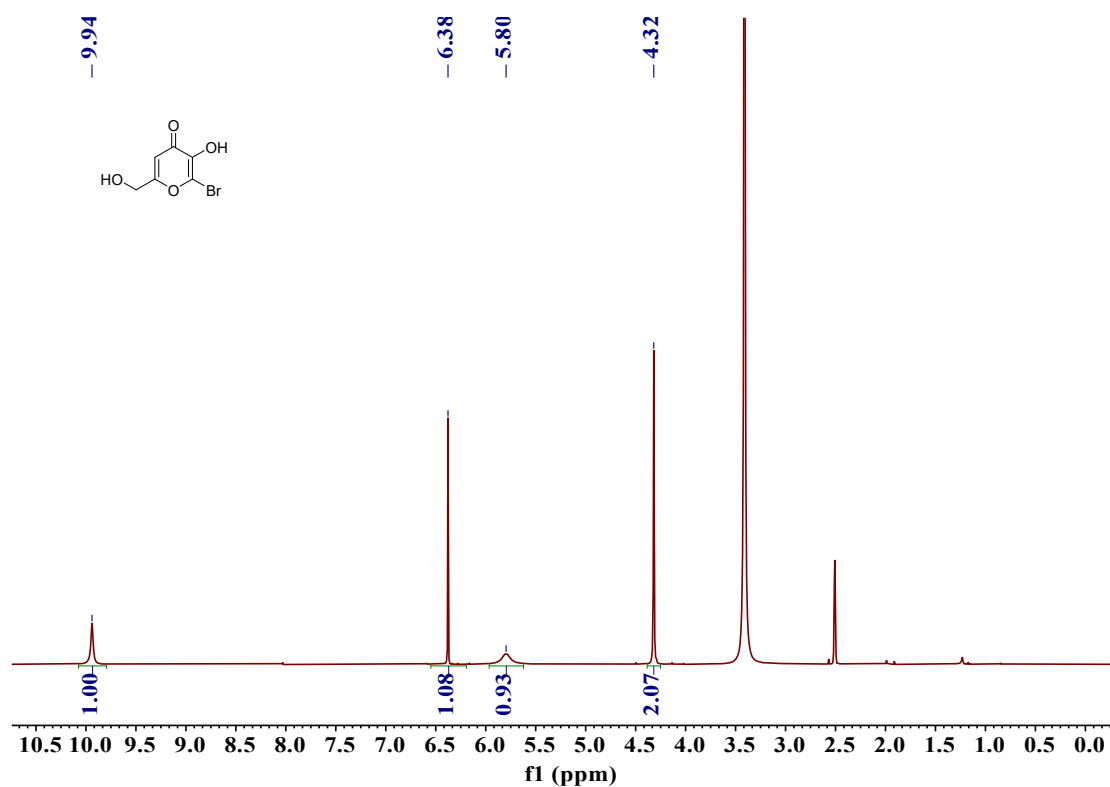

Figure S1.  $^1\text{H-NMR}$  spectrum of **2a** (solvent  $\text{DMSO-}d_6$ , 400 MHz)

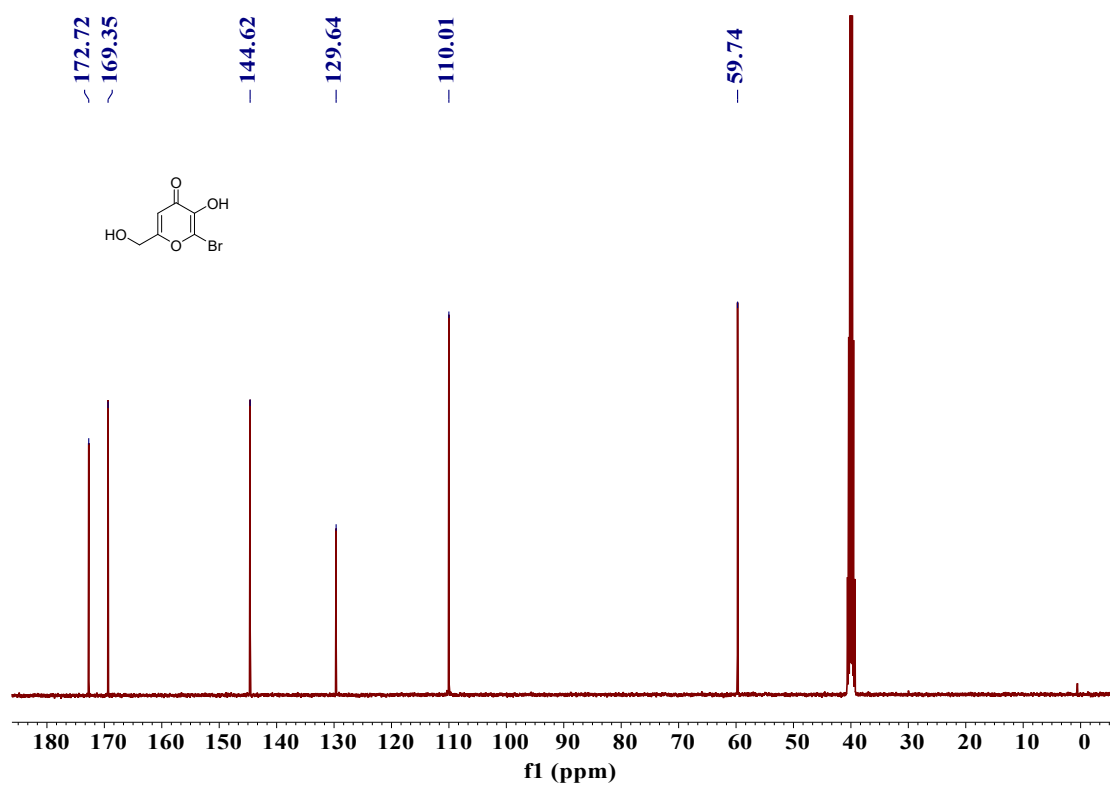

Figure S2.  $^{13}\text{C-NMR}$  spectrum of **2a** (solvent  $\text{DMSO-}d_6$ , 100 MHz)

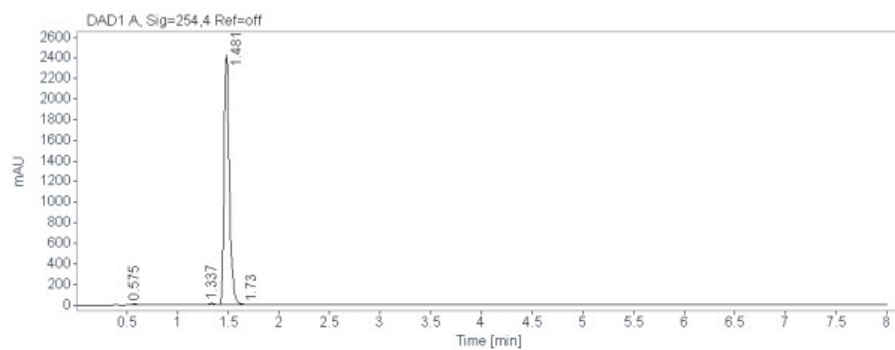

Signal: DAD1 A, Sig=254,4 Ref=off

| Name | RT [min] | Height     | Area       | Area%  |
|------|----------|------------|------------|--------|
|      | 0.575    | 12.64760   | 39.15671   | 0.444  |
|      | 1.337    | 16.87968   | 59.13989   | 0.671  |
|      | 1.481    | 2436.12012 | 8710.54102 | 98.819 |
|      | 1.730    | 2.13698    | 5.80268    | 0.066  |
|      | Sum      |            | 8814.64029 |        |

Signal: MSD1 TIC, MS File

| Name | RT [min] | Height        | Area          | Area%   |
|------|----------|---------------|---------------|---------|
|      | 1.557    | 1668619.25000 | 10434263.0000 | 100.000 |
|      | Sum      |               | 10434263.0000 |         |

Figure S3. HPLC of compound **2a** ( $t_R = 1.481$  min, 98.8% purity)

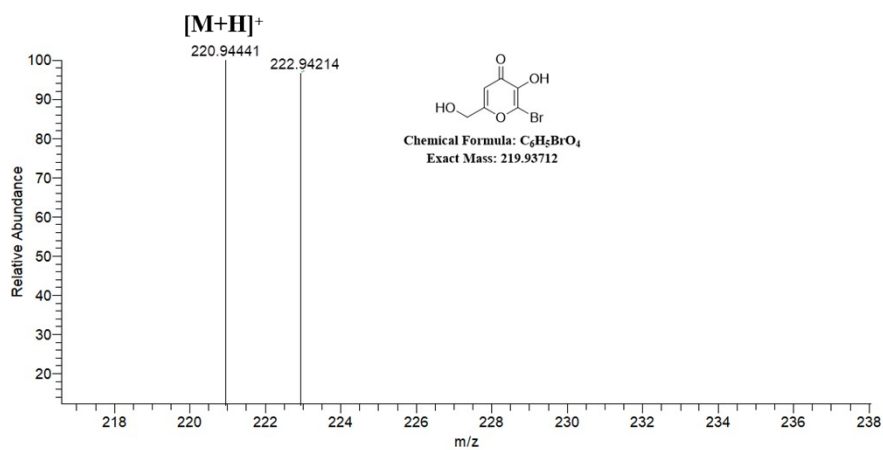

Figure S4. HRMS of compound **2a**

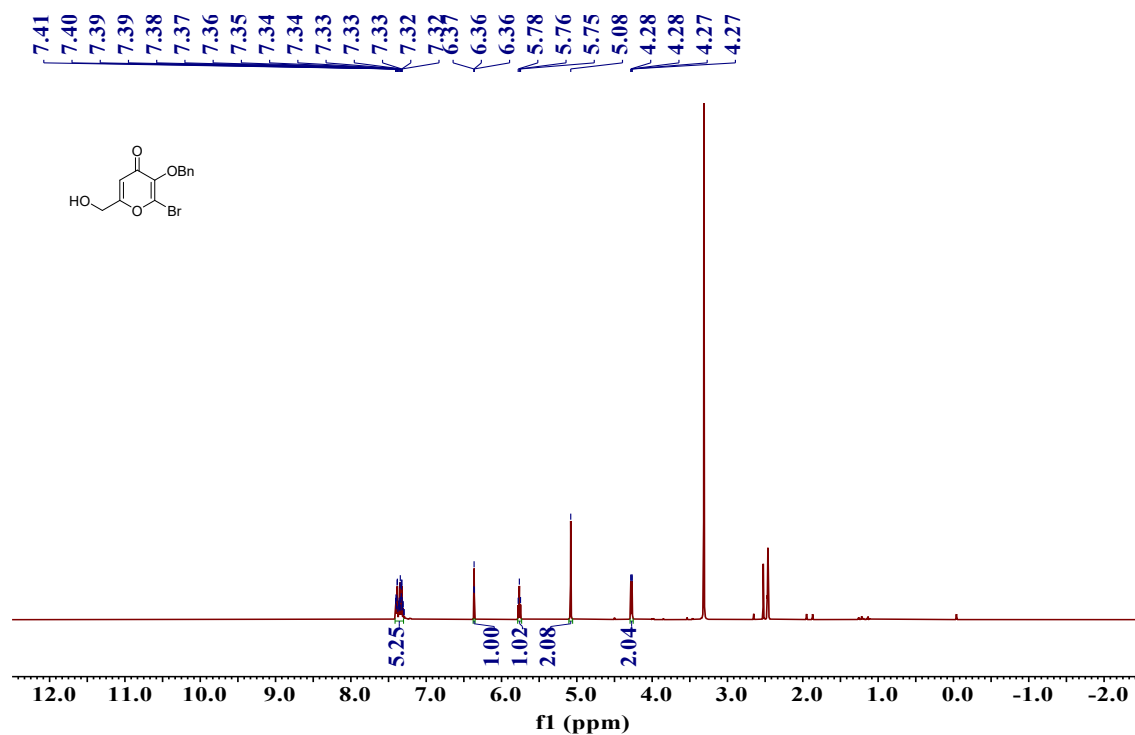

Figure S5. <sup>1</sup>H-NMR spectrum of **2b** (solvent DMSO-*d*<sub>6</sub>, 400 MHz)

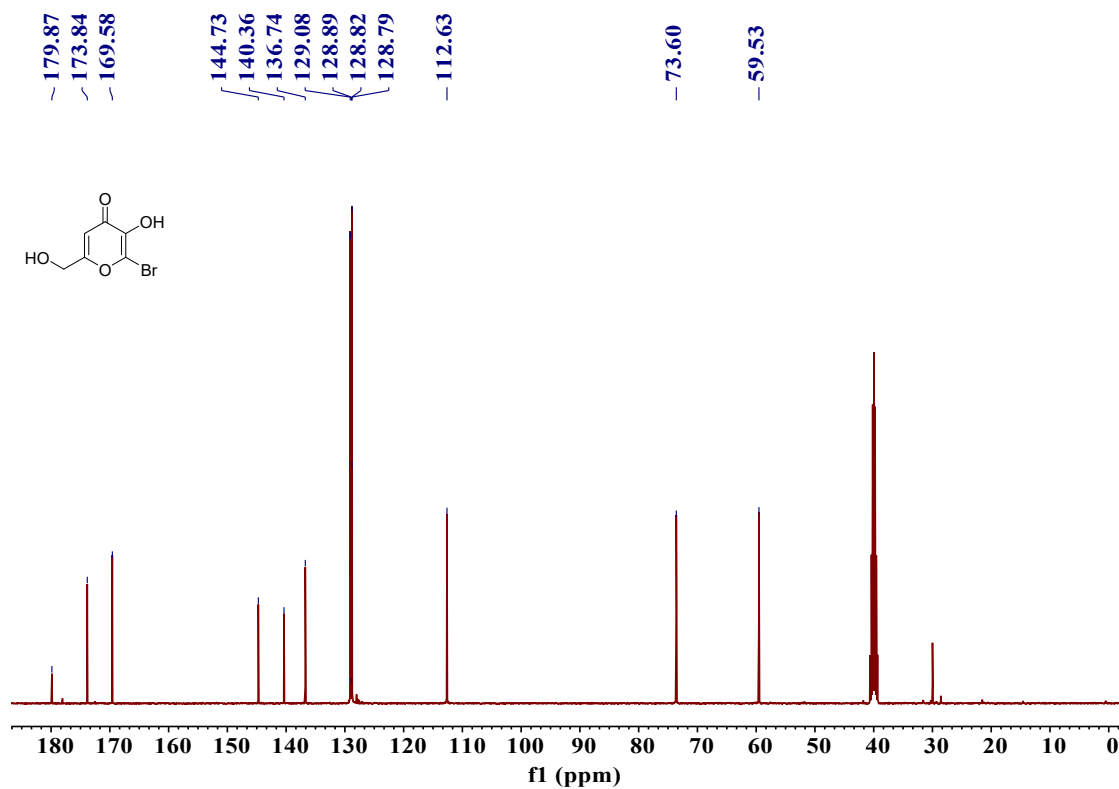

Figure S6. <sup>13</sup>C-NMR spectrum of **2b** (solvent DMSO-*d*<sub>6</sub>, 100 MHz)

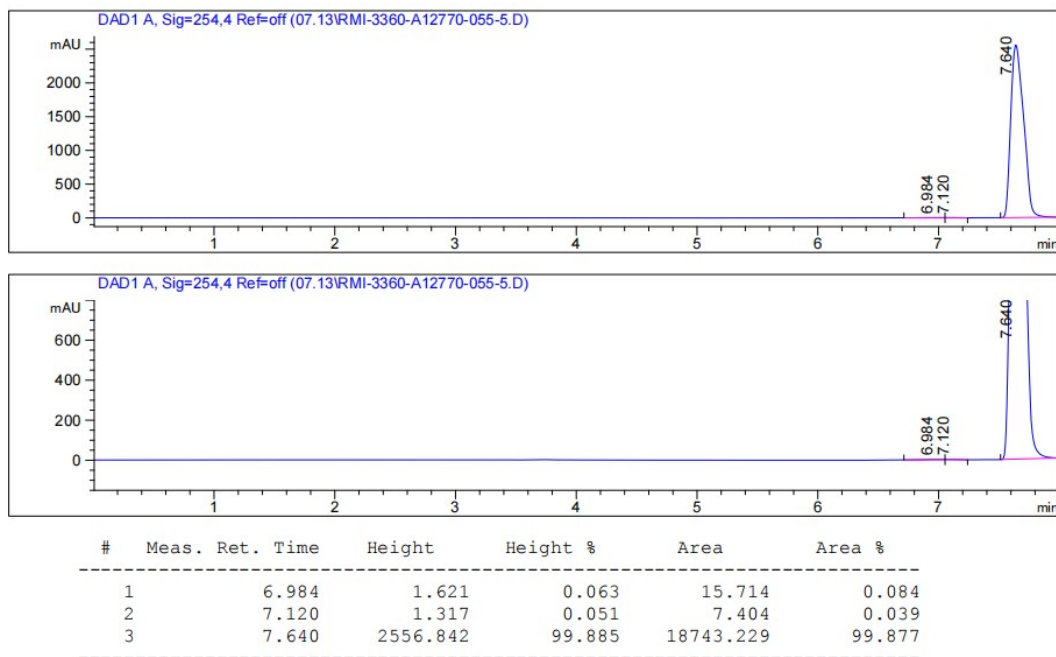

**Figure S7.** HPLC of compound **2b** ( $t_R = 7.640$  min, 99.9% purity)

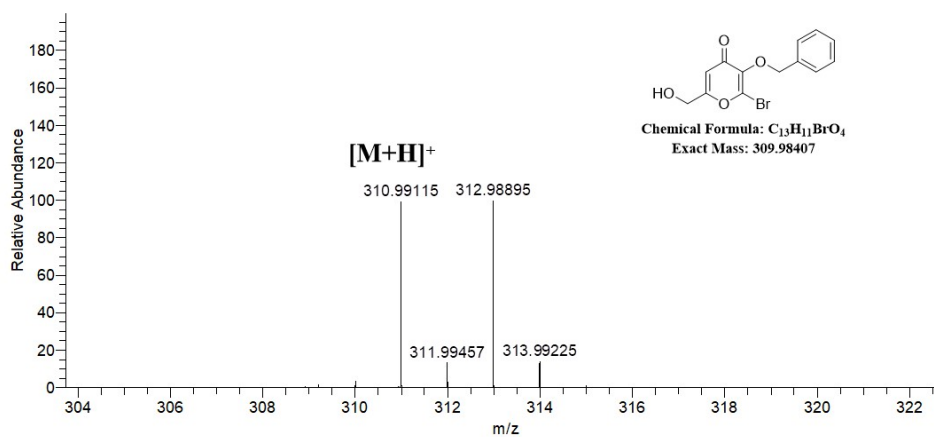

**Figure S8.** HRMS of compound **2b**

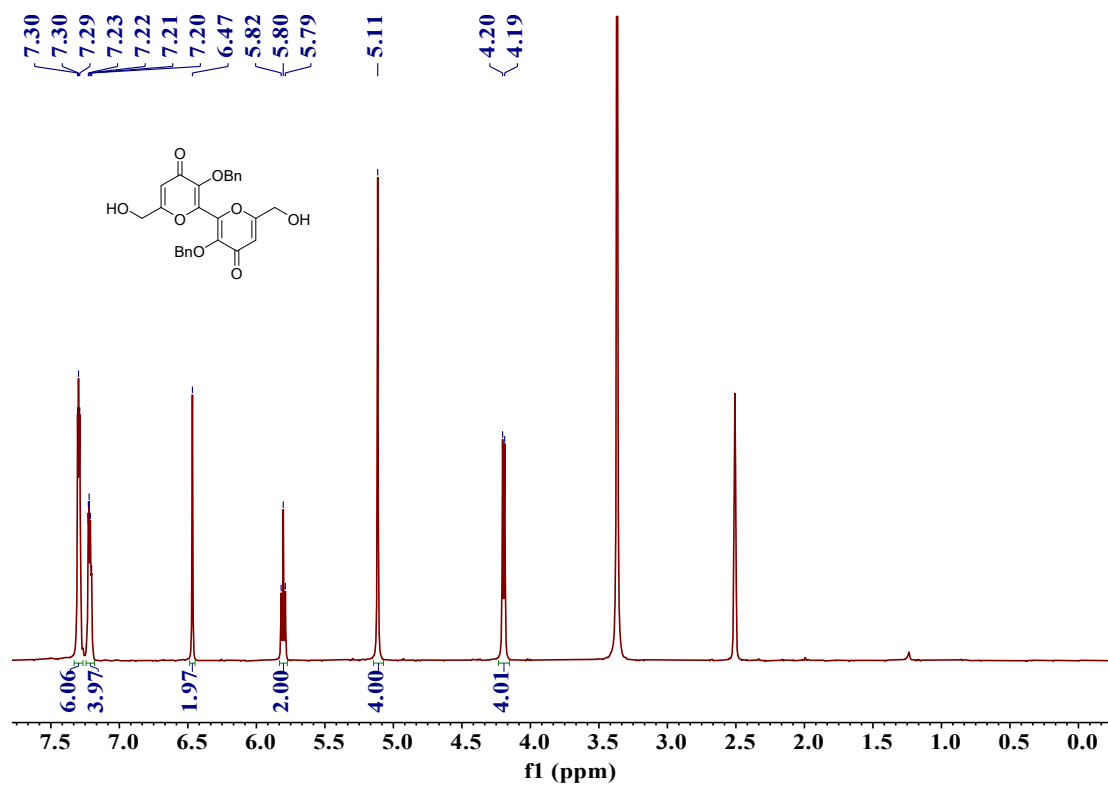

Figure S9. <sup>1</sup>H-NMR spectrum of **2c** (solvent DMSO-*d*<sub>6</sub>, 400 MHz)

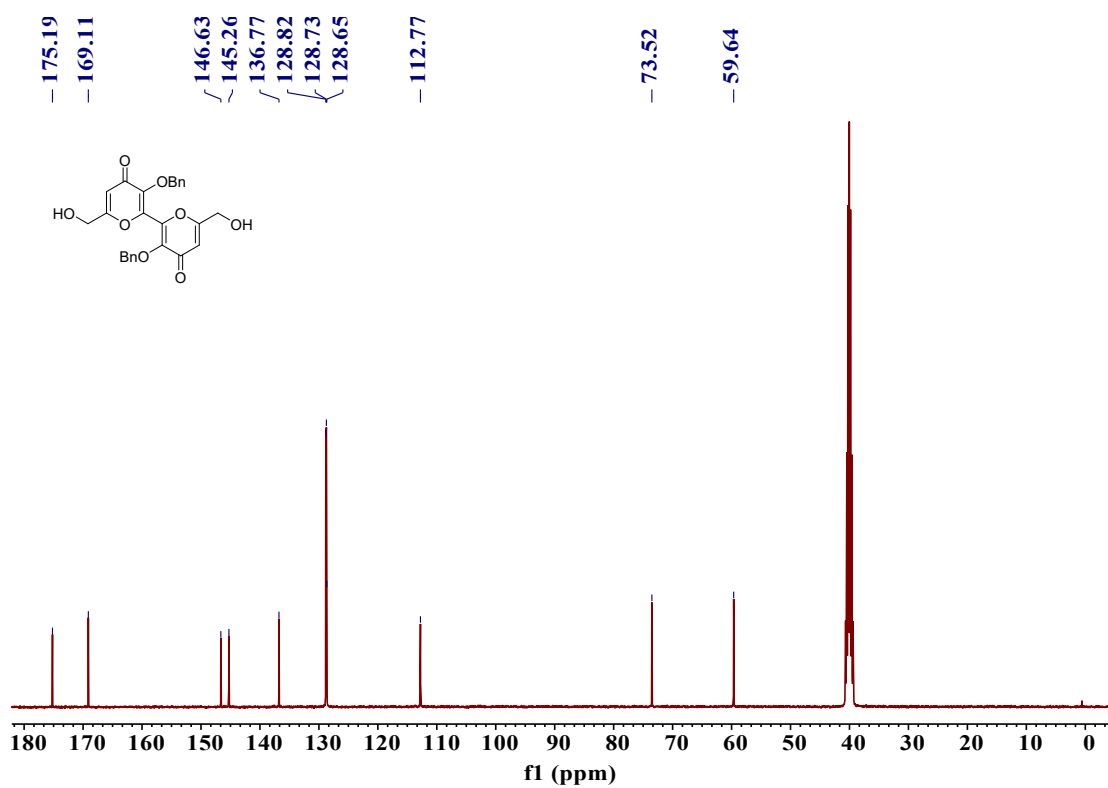

Figure S10. <sup>13</sup>C-NMR spectrum of **2c** (solvent DMSO-*d*<sub>6</sub>, 100 MHz)

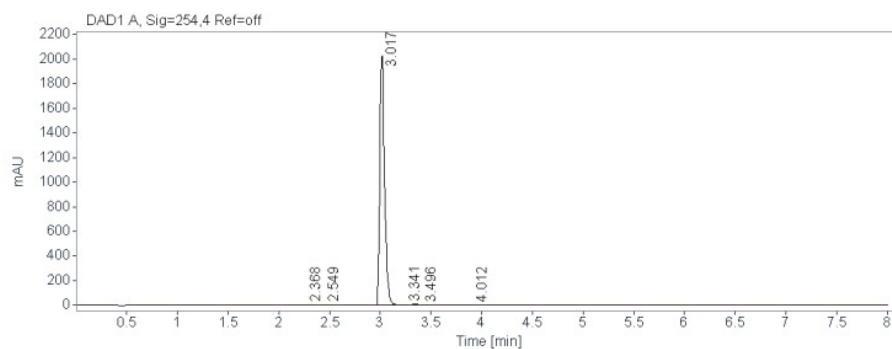

Signal: DAD1 A, Sig=254,4 Ref=off

| Name | RT [min] | Height     | Area       | Area%  |
|------|----------|------------|------------|--------|
|      | 2.368    | 4.79719    | 14.25930   | 0.214  |
|      | 2.549    | 2.21418    | 5.57477    | 0.084  |
|      | 3.017    | 2046.45203 | 6605.24219 | 98.990 |
|      | 3.341    | 9.05428    | 28.72350   | 0.430  |
|      | 3.496    | 3.78189    | 12.18742   | 0.183  |
|      | 4.012    | 1.98748    | 6.65501    | 0.100  |
| Sum  |          |            | 6672.64219 |        |

Signal: MSD1 TIC, MS File

| Name | RT [min] | Height        | Area          | Area%   |
|------|----------|---------------|---------------|---------|
|      | 3.099    | 3810789.50000 | 27842504.0000 | 100.000 |
| Sum  |          |               | 27842504.0000 |         |

Figure S11. HPLC of compound **2c** ( $t_R = 3.017$  min, 99.0% purity)

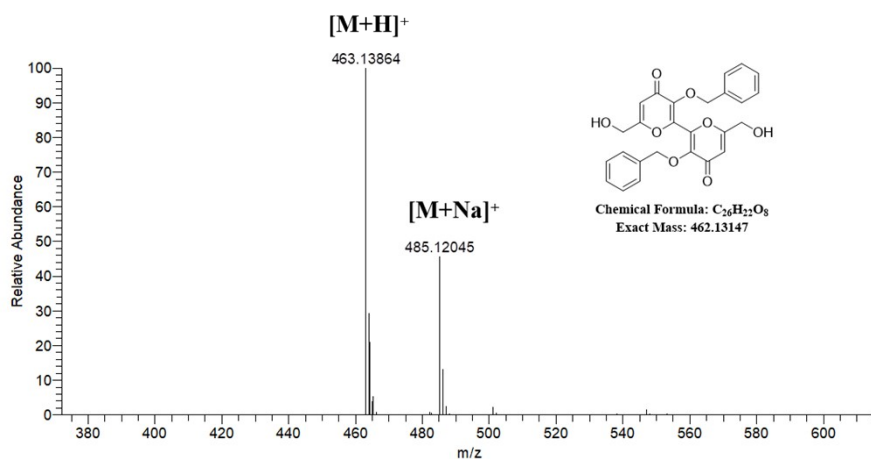

Figure S12. HRMS of compound **2c**



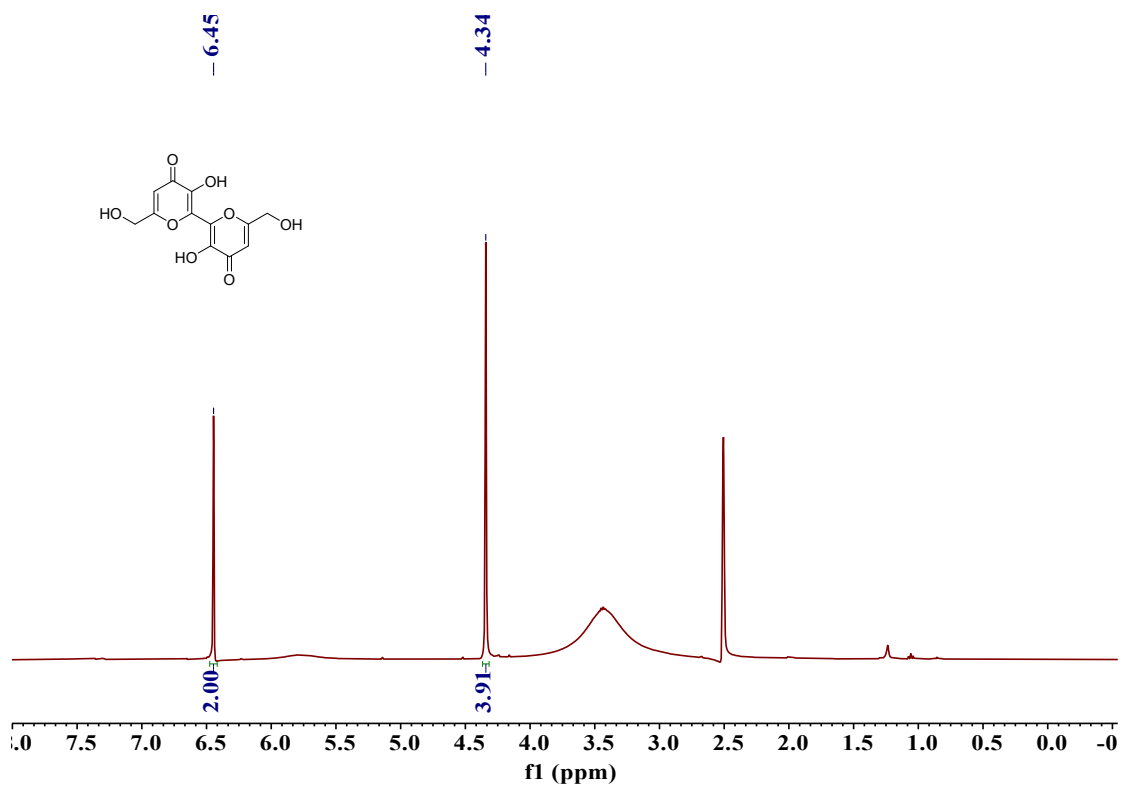

Figure S13.  $^1\text{H-NMR}$  spectrum of **KAD** (solvent  $\text{DMSO-}d_6$ , 400 MHz)

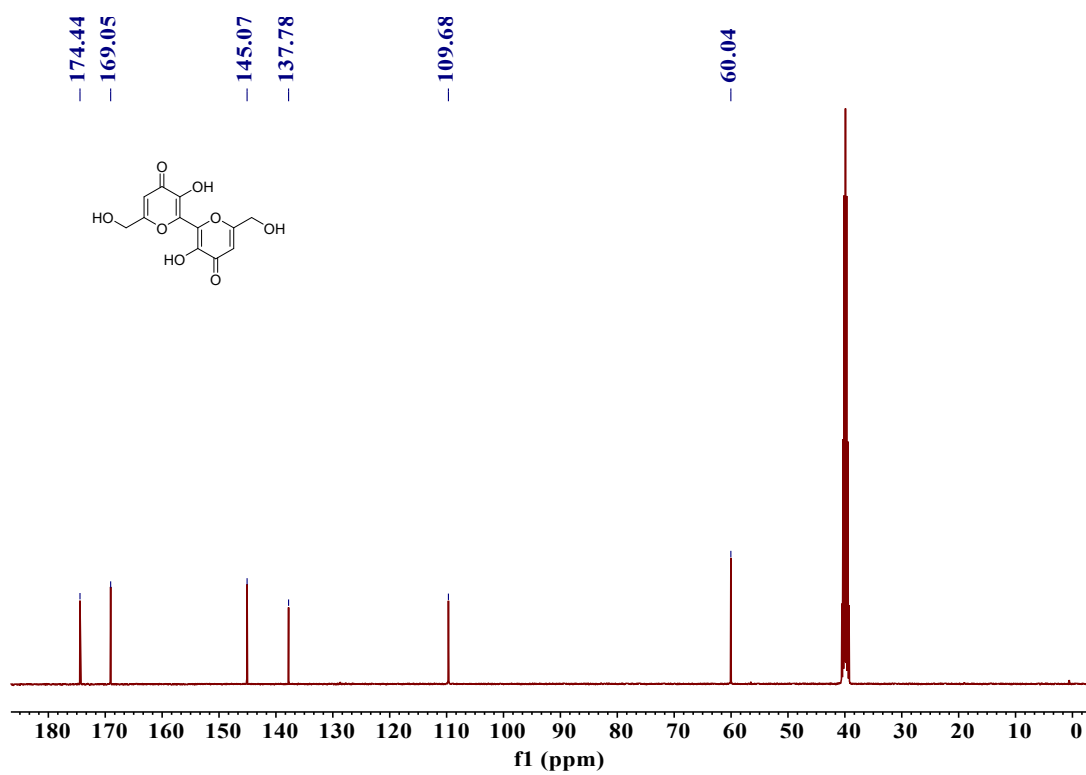

Figure S14.  $^{13}\text{C-NMR}$  spectrum of **KAD** (solvent  $\text{DMSO-}d_6$ , 100 MHz)

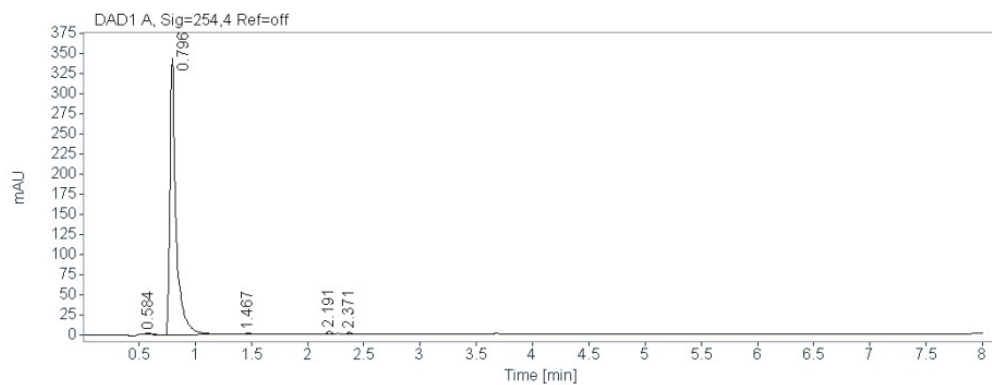

Signal: DAD1 A, Sig=254,4 Ref=off

| Name | RT [min] | Height    | Area       | Area%  |
|------|----------|-----------|------------|--------|
|      | 0.584    | 2.10841   | 7.02529    | 0.512  |
|      | 0.796    | 342.85400 | 1343.36609 | 97.842 |
|      | 1.467    | 1.55136   | 7.09679    | 0.517  |
|      | 2.191    | 3.22409   | 8.54370    | 0.622  |
|      | 2.371    | 2.24691   | 6.96297    | 0.507  |
|      | Sum      |           | 1372.99484 |        |

Signal: MSD1 TIC, MS File

| Name | RT [min] | Height       | Area          | Area%   |
|------|----------|--------------|---------------|---------|
|      | 0.873    | 932102.00000 | 6942991.00000 | 100.000 |
|      | Sum      |              | 6942991.00000 |         |

Figure S15. HPLC of compound **KAD** ( $t_R = 0.796$  min, 97.8% purity)

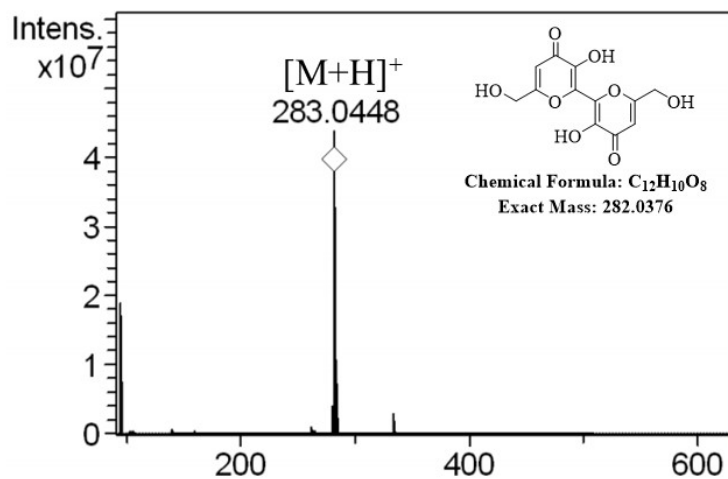

Figure S16. HRMS of compound **KAD**

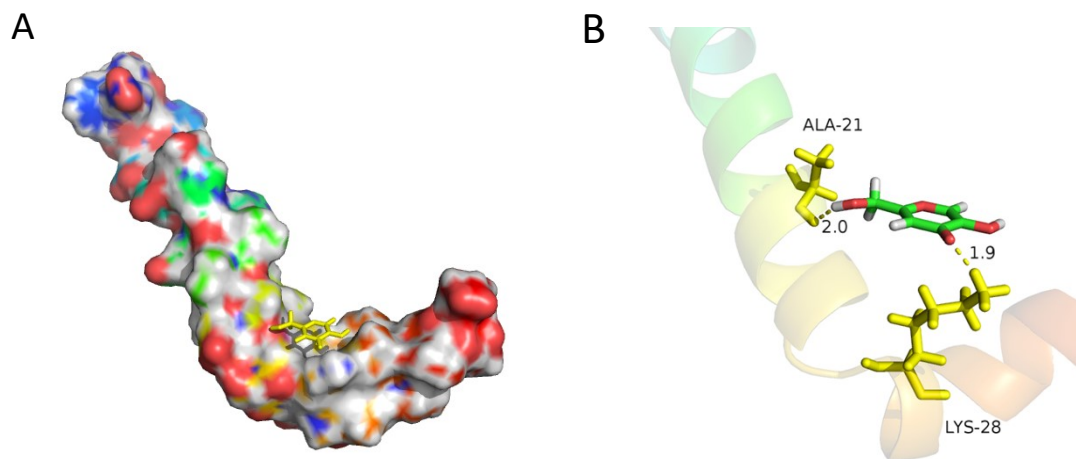

**Figure S17.** Docking study of KA with A $\beta$ <sub>1-42</sub> (PDB:1IYT). (A) Full view of KA (colored yellow) binding to A $\beta$ <sub>1-42</sub>. (B) The possible hydrogen bonds between KA and residues Ala 21 and Lys 28 are indicated by yellow dotted lines.

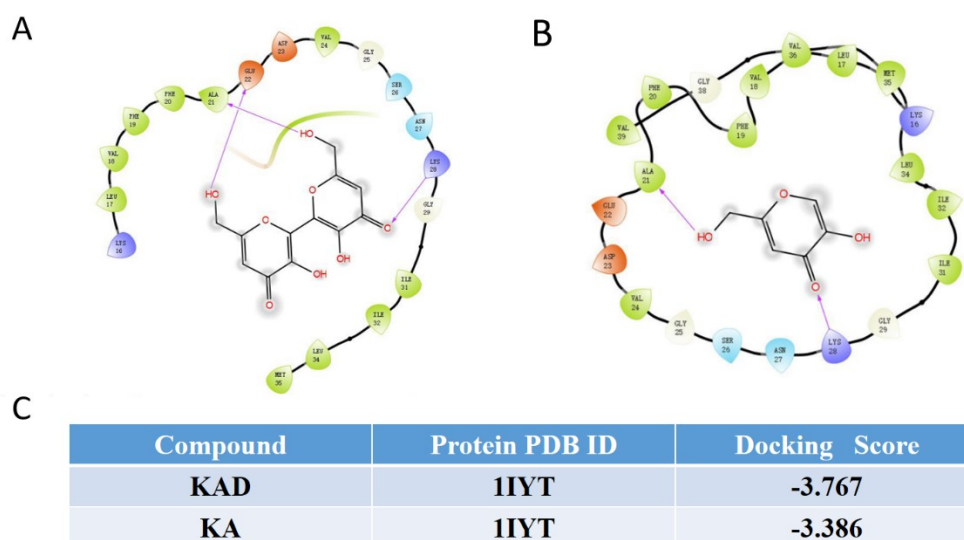

**Figure S18.** 2D schematic diagram and predicted docking scoring of KAD and KA with A $\beta$ <sub>1-42</sub>. (A) 2D schematic diagram of KAD and A $\beta$ <sub>1-42</sub> docking models; (B) 2D schematic diagram of KA and A $\beta$ <sub>1-42</sub> docking models; (C) Docking Score of KAD and KA with A $\beta$ <sub>1-42</sub>.

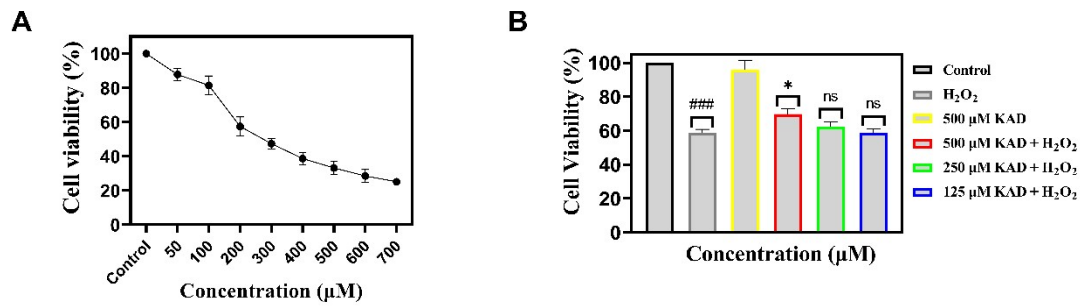

**Figure S19.** KAD inhibits H<sub>2</sub>O<sub>2</sub>-induced injury in H9c2 cells. (A) H<sub>2</sub>O<sub>2</sub> reduced H9c2 cell viability in a concentration-dependent manner (2 h); (B) Effect of KAD on the viability of H9c2 cells treated by H<sub>2</sub>O<sub>2</sub>. Cell viability was determined by MTT assay. The values are presented as mean ± SEM (n = 3). ###P < 0.001 vs. the control group; P\* < 0.05 vs. the H<sub>2</sub>O<sub>2</sub>-treated group.

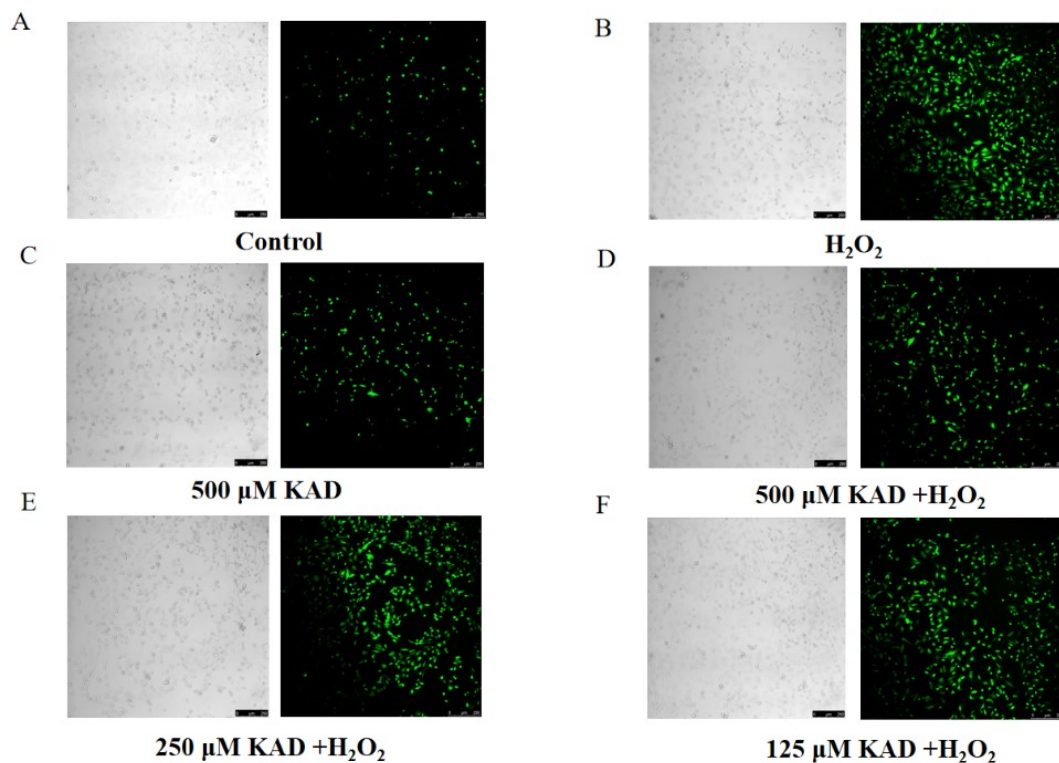

**Figure S20.** Inhibitory effect of KAD on intracellular ROS accumulation in H9c2 cells exposed to H<sub>2</sub>O<sub>2</sub> (10×). Images of cells stained with 2',7'-dichlorofluorescein (DCF) showing the ROS contents in H9c2 cells: (A) Control; (B) H<sub>2</sub>O<sub>2</sub>; (C) 500 μM KAD; (D) 500 μM KAD + H<sub>2</sub>O<sub>2</sub>; (E) 250 μM KAD + H<sub>2</sub>O<sub>2</sub>; and (F) 125 μM KAD + H<sub>2</sub>O<sub>2</sub>.

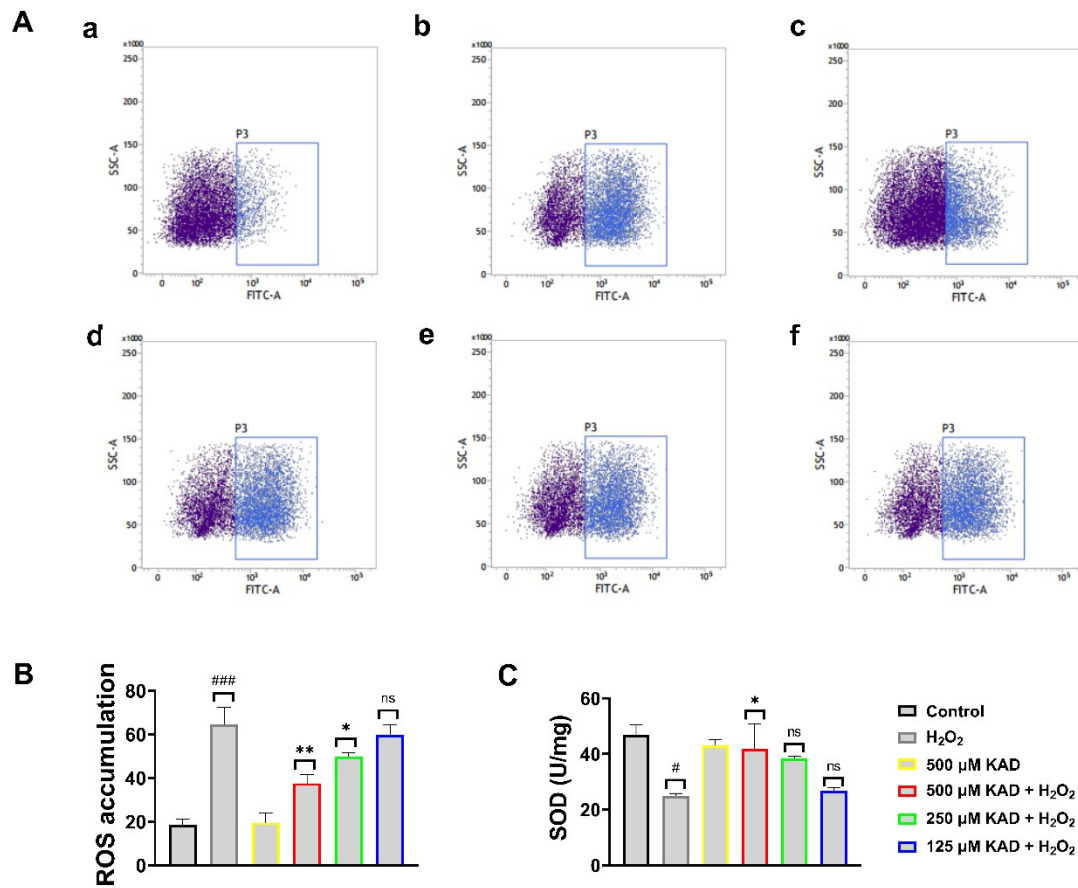

**Figure S21.** KAD alleviated intracellular ROS accumulation and increased the SOD activity induced by H<sub>2</sub>O<sub>2</sub> in H9c2 cells. (A) Flow cytometry images for each group: (a) Control; (b) H<sub>2</sub>O<sub>2</sub>; (c) 500 μM KAD; (d) 500 μM KAD + H<sub>2</sub>O<sub>2</sub>; (e) 250 μM KAD + H<sub>2</sub>O<sub>2</sub>; and (f) 125 μM KAD + H<sub>2</sub>O<sub>2</sub>; (B) ROS quantification by DCFH-DA using flow cytometry (20000 cells); (C) Effect of KAD on SOD activity. All data are presented as mean ± SEM of three independent experiments. #P < 0.05 and ###P < 0.001 vs. the control group; P\* < 0.05 and \*\*P < 0.01 vs. the H<sub>2</sub>O<sub>2</sub>-treated group.

Crystallographic data was collected on a Mercury single crystal diffractometer at room temperature. The structures were solved with direct methods by using OlexSys or SHELXS-97 and refined with the full-matrix least-squares technique based on F2 by using the OlexSys or SHELXL-97

**Table S1.** Summary of crystallographic data for KAD

|                         |                                                |                           |                 |
|-------------------------|------------------------------------------------|---------------------------|-----------------|
| Formula                 | C <sub>12</sub> H <sub>10</sub> O <sub>8</sub> | $\beta / ^\circ$          | 99.527(8)       |
| Formula weight          | 282.21                                         | $\gamma / ^\circ$         | 90.000          |
| $T/K$                   | 293(2)                                         | $V/ \text{\AA}^3$         | 557.23(9)       |
| Crystallization solvent | methanol                                       | $Z$                       | 2               |
| Color                   | white                                          | $D_x / \text{g cm}^{-3}$  | 1.682           |
| Crystal system          | monoclinic                                     | $\mu / \text{mm}^{-1}$    | 0.803           |
| Space group             | $P2_1/n$                                       | $F(000)$                  | 292             |
| $a / \text{\AA}$        | 3.8200(4)                                      | $\theta$ range / $^\circ$ | 4.395 to 60.445 |
| $b / \text{\AA}$        | 17.5109(17)                                    | GOF on F <sup>2</sup>     | 1.055           |
| $c / \text{\AA}$        | 8.4469(7)                                      | $R_1 [I > 2\sigma(I)]$    | 0.0371          |
| $\alpha / ^\circ$       | 90.000                                         | $wR_2$ (all data)         | 0.1030          |
