# Supplementary figures and images for: Synthesis and properties of the kojic acid dimer and its potential for the treatment of Alzheimer's disease
Source: Royal Society of Chemistry journal article supplement (doi:10.1039/d2md00383j), 2022-12-09

A

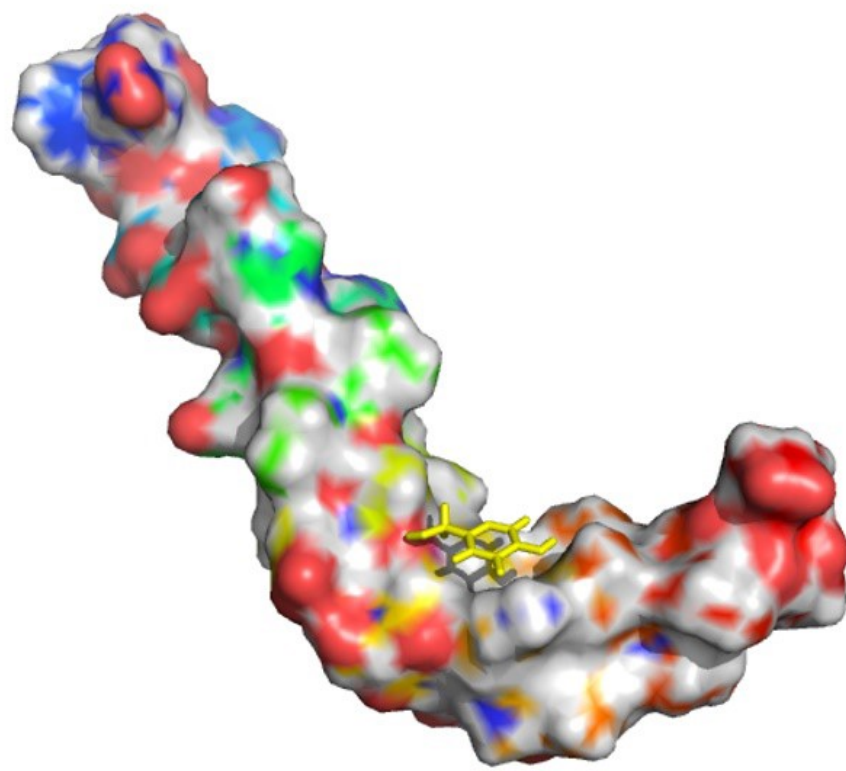

B

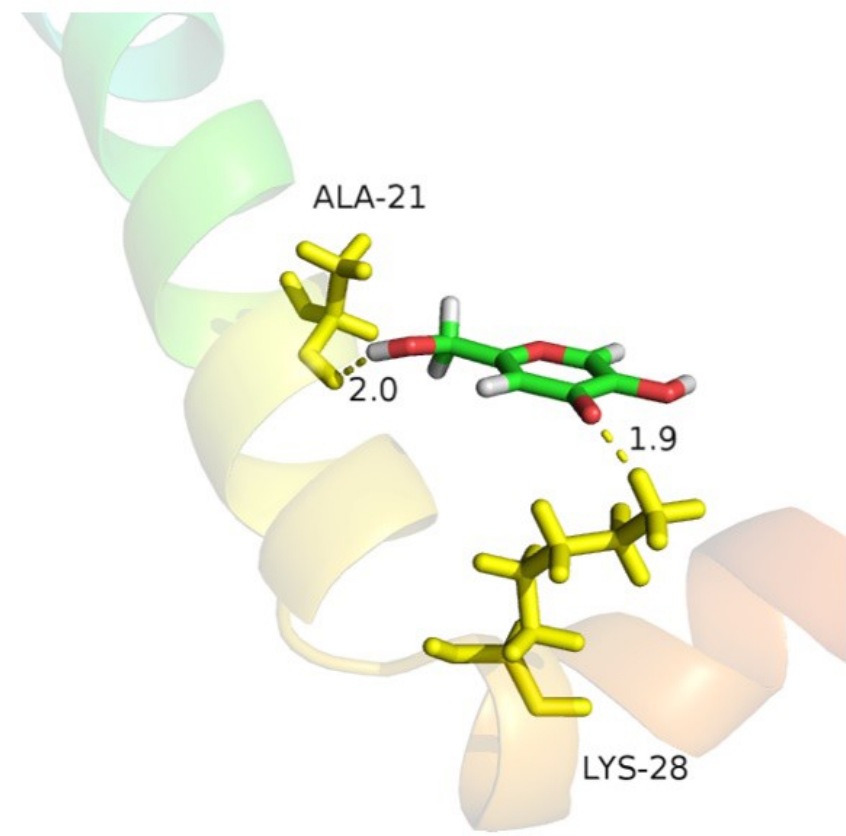

Supplement: d2md00383j1.pdf [file d2md00383j1.pdf]

A

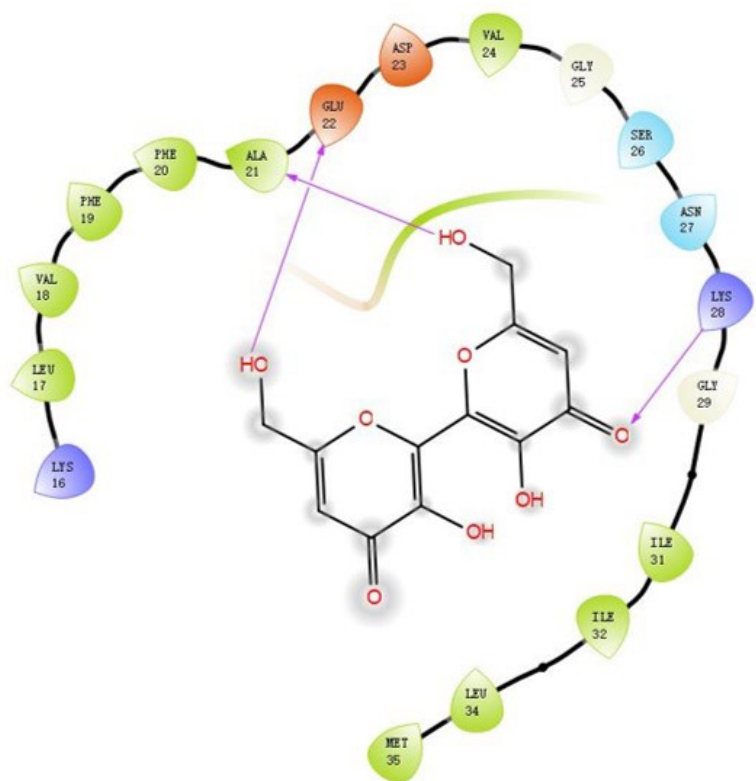

B

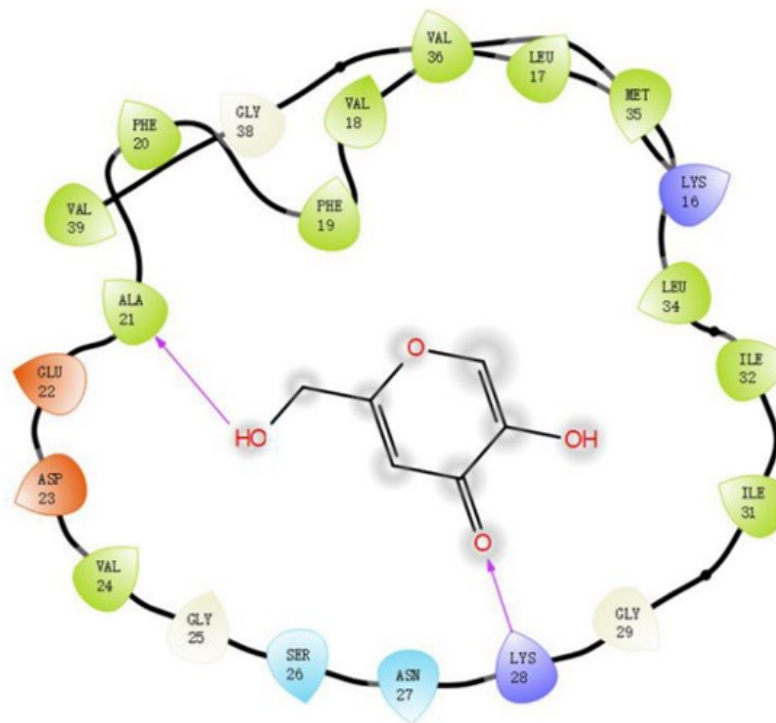

C

| Compound   | Protein PDB ID | Docking Score |
|------------|----------------|---------------|
| <b>KAD</b> | <b>1IYT</b>    | <b>-3.767</b> |
| <b>KA</b>  | <b>1IYT</b>    | <b>-3.386</b> |

Supplement: d2md00383j2.pdf [file d2md00383j2.pdf]

**A**

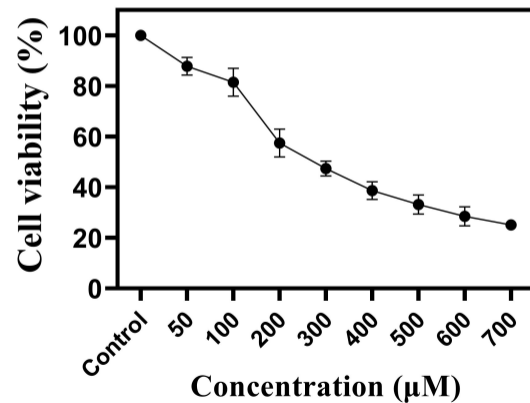

**B**

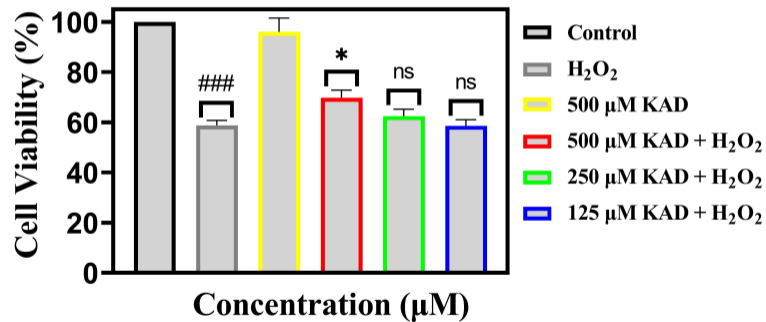

Supplement: d2md00383j3.pdf [file d2md00383j3.pdf]

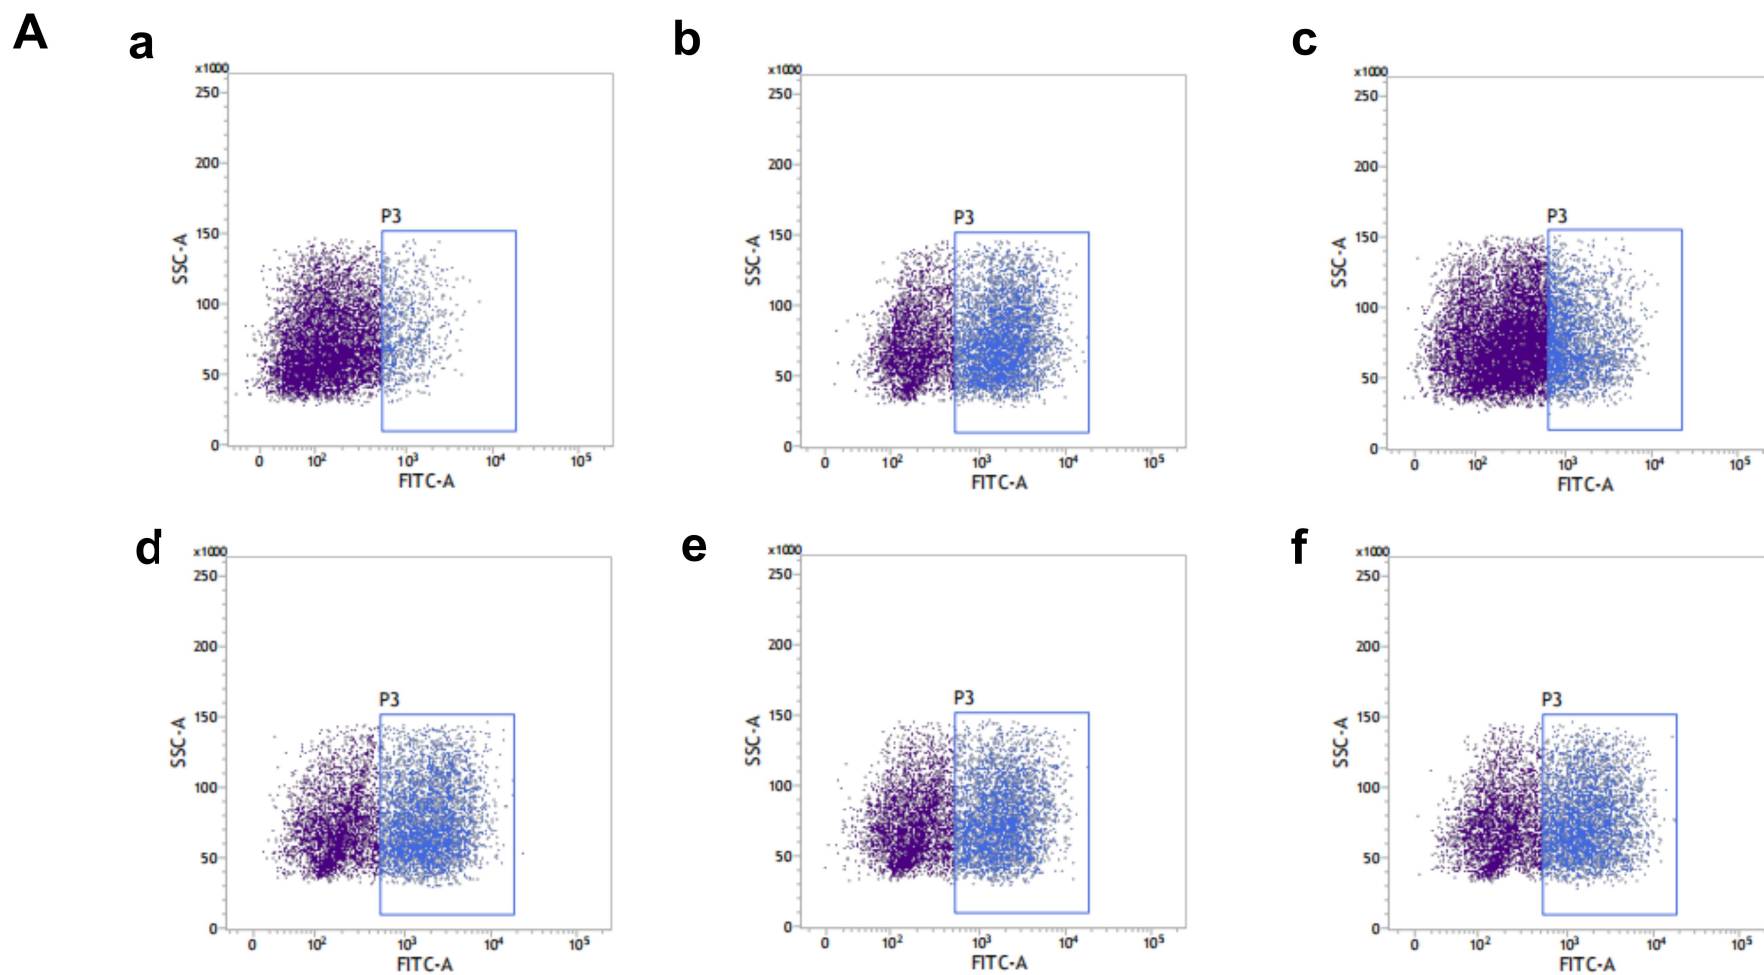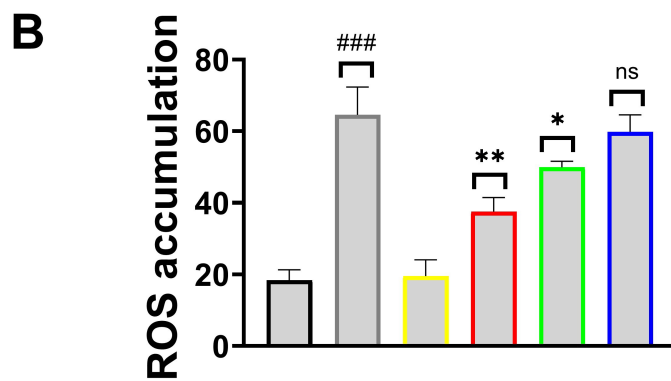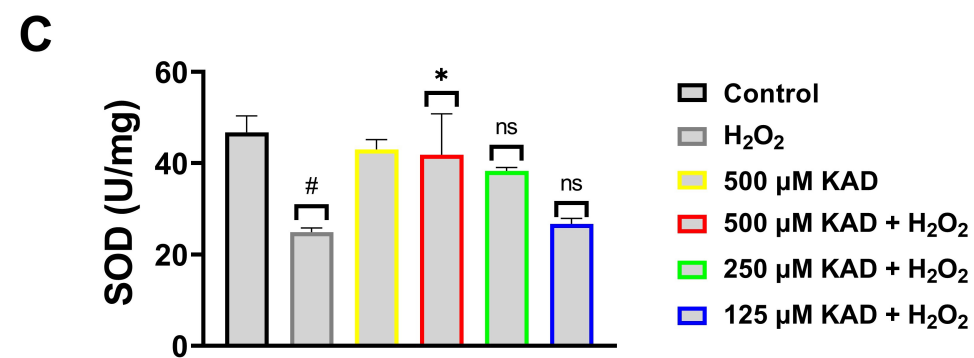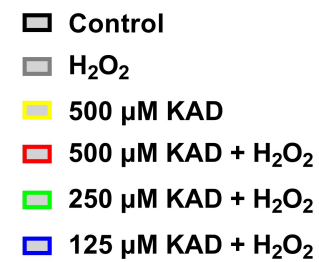

Supplement: d2md00383j5.pdf [file d2md00383j5.pdf]
